# Supplementary material for: Deep neural network analyses of spirometry for structural phenotyping of chronic obstructive pulmonary disease
Source: JCI journal article supplement (doi:10.1172/jci.insight.132781), 2020-06-18
Supplement: sd2 [file 2]

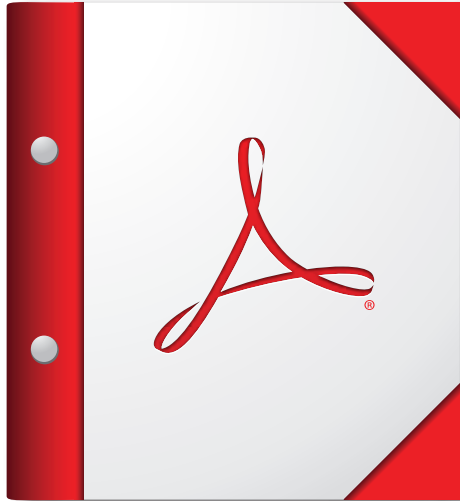

**For the best experience, open this PDF portfolio in  
Acrobat X or Adobe Reader X, or later.**

[Get Adobe Reader Now!](#)
